# Supplementary material for: Integrative analysis reveals early epigenetic alterations in high-grade serous ovarian carcinomas
Source: PubMed Central journal article supplement (PMC10618212; doi:10.1038/s12276-023-01090-1), 2023-10-02
Supplement: 12276_2023_1090_MOESM1_ESM.pdf [file 12276_2023_1090_MOESM1_ESM.pdf]

**Supplementary information for  
Integrative analysis reveals early epigenetic alterations in high-grade serous  
ovarian carcinomas**

Hidenori Machino, Ai Dozen, Mariko Konaka, Masaaki Komatsu, Kohei Nakamura,  
Noriko Ikawa, Kanto Shozu, Ken Asada, Syuzo Kaneko, Hiroshi Yoshida, Tomoyuki  
Kato, Kentaro Nakayama, Vassiliki Saloura, Satoru Kyo, and Ryuji Hamamoto

The file contains

Supplementary Tables 1 – 2

Supplementary Figures 1 – 7

**Supplementary Table 1** Information of certified cell lines.

| Name      | Certification institution | <i>BRCA1</i>                | <i>BRCA2</i>       | Tested method | DNA profile or characteristics                                                                                                             |
|-----------|---------------------------|-----------------------------|--------------------|---------------|--------------------------------------------------------------------------------------------------------------------------------------------|
| 293T      | ATCC                      | Not assessed                | Not assessed       | STR           | Amelogenin: X CSF1PO: 11, 12<br>D13S317: 12, 14 D16S539: 9, 13<br>D5S818: 8, 9 D7S820: 11<br>THO1: 7, 9.3 TPOX: 11 vWA: 16, 19             |
| CaOV3     | ATCC                      | Wild type                   | Wild type          | STR           | Amelogenin: X CSF1PO: 10, 13<br>D13S317: 12 D16S539: 9<br>D5S818: 12 D7S820: 10 THO1: 7<br>TPOX: 8, 10 vWA: 16, 18                         |
| ES2       | ATCC                      | Wild type                   | Wild type          | STR           | Amelogenin: X CSF1PO: 10<br>D13S317: 11 D16S539: 11, 13<br>D5S818: 11, 13 D7S820: 11<br>THO1: 9.3 TPOX: 8, 12 vWA: 16, 17                  |
| JHOS-2    | RIKEN CELL BANK           | M1?<br>(Driver)             | Wild type          | STR           | Amelogenin: X CSF1PO: 11<br>D13S317: 8, 9 D16S539: 13<br>D21S11: 31, 31.2 D5S818: 10<br>D7S820: 11 THO1: 6, 7 TPOX: 8, 11<br>vWA: 14, 17   |
| JHOS-4    | RIKEN CELL BANK           | Y1202Qfs<br>*12<br>(Driver) | Wild type          | STR           | Amelogenin: X CSF1PO: 10<br>D13S317: 11 D16S539: 9, 10<br>D21S11: 29, 31.2 D5S818: 11<br>D7S820: 10 THO1: 7 TPOX: 8, 12<br>vWA: 14         |
| OVCAR3    | RIKEN CELL BANK           | Wild type                   | HOMDEL<br>(Driver) | STR           | Amelogenin: X CSF1PO: 11, 12<br>D13S317: 12 D16S539: 12<br>D5S818: 11, 12 D7S820: 10<br>THO1: 9, 9.3 TPOX: 8 vWA: 17                       |
| KURAMOCHI | JCRB                      | HOMDEL<br>(Driver)          | R2318*<br>(Driver) | STR           | Amelogenin: X CSF1PO: 11, 12<br>D13S317: 9, 12 D16S539: 10<br>D5S818: 12 D7S820: 10, 11<br>THO1: 9 TPOX: 8, 12 vWA: 16, 19                 |
| OVSAHO    | JCRB                      | Wild type                   | HOMDEL<br>(Driver) | STR           | Amelogenin: X CSF1PO: 10, 12<br>D13S317: 8 D16S539: 9<br>D5S818: 12, 13 D7S820: 8, 10<br>THO1: 6 TPOX: 8, 11 vWA: 14                       |
| RMUGS     | JCRB                      | Wild type                   | Wild type          | STR           | Amelogenin: X CSF1PO: 12<br>D13S317: 10, 11 D16S539: 10,<br>11 D5S818: 10, 14 D7S820: 12<br>THO1: 9 TPOX: 8, 11 vWA: 14,<br>16             |
| TYK-nu    | JCRB                      | Wild type                   | Wild type          | STR           | Amelogenin: X CSF1PO: 12<br>D13S317: 10, 11 D16S539: 9, 10<br>D5S818: 12, 13 D7S820: 10<br>THO1: 9 TPOX: 9, 11 vWA: 14,<br>16              |
| SNU8      | KCLB                      | Wild type                   | Wild type          | STR           | Amelogenin: X CSF1PO: 9, 12<br>D13S317: 8, 9 D3S1358: 14, 16<br>D5S818: 11, 12 D7S820: 8, 12<br>FGA: 20, 26 THO1: 7, 9 TPOX:<br>11 vWA: 17 |

ATCC; American Type Culture Collection

JCRB; Japanese Collection of Research Bioresources

KCLB; Korean Cell Line Bank

*BRCA1* and *BRCA2* gene profiles were sourced from Cancer Cell Line Encyclopedia (CCLE).

**Supplementary Table 2** Information of primers.

| Primer names  | Purpose | Direction | Sequence (5' -> 3' direction) |
|---------------|---------|-----------|-------------------------------|
| <i>GAPDH</i>  | qPCR    | Forward   | GCAAATTCCATGGCACCGTC          |
|               |         | Reverse   | TCGCCCACTTGATTTTGG            |
| <i>MAF</i>    | qPCR    | Forward   | TATGCCCAGTCTGCCGCTT           |
|               |         | Reverse   | CGCTGCTCGAGCCGTTTTCT          |
| <i>GATA6</i>  | qPCR    | Forward   | GCCACTACCTGTGCAACGCCT         |
|               |         | Reverse   | CAATCCAAGCCGCCGTGATGAA        |
| <i>DAB2</i>   | qPCR    | Forward   | CTCTGTCCAGTCCTCACCACAT        |
|               |         | Reverse   | GTTCTGAGACGGGAGGAGCAAA        |
| <i>WWOX</i>   | qPCR    | Forward   | TCCTCCAGGATGTTTTGTGCCG        |
|               |         | Reverse   | AAGCCAGCATCGCCCAATAGTC        |
| <i>CDH1</i>   | qPCR    | Forward   | GCCTCCTGAAAAGAGAGTGGAAG       |
|               |         | Reverse   | TGGCAGTGTCTCTCCAAATCCG        |
| <i>DANCR</i>  | qPCR    | Forward   | GCCACTATGTAGCGGGTTTC          |
|               |         | Reverse   | ACCTGCGCTAAGAAGTGGG           |
| <i>CXCL1</i>  | qPCR    | Forward   | AGCTTGCCTCAATCCTGCATCC        |
|               |         | Reverse   | TCCTTCAGGAACAGCCACCAGT        |
| <i>CXCL2</i>  | qPCR    | Forward   | AGGGGTTGCGCGTTCTCGGA          |
|               |         | Reverse   | CCGCAGGAGCCGGGGATTG           |
| <i>CXCL3</i>  | qPCR    | Forward   | CGCCCAAACCGAAGTCATAG          |
|               |         | Reverse   | GCTCCCCTTGTTCAGTATCTTTT       |
| <i>CXCL5</i>  | qPCR    | Forward   | GAGAGCTGCGTTGCGTTTGTTTAC      |
|               |         | Reverse   | CCGTTCTTCAGGGAGGCTACCACT      |
| <i>CXCL8</i>  | qPCR    | Forward   | CACTGCGCCAACACAGAAAT          |
|               |         | Reverse   | GCCCTCTTCAAAAAGTCTCCAC        |
| <i>PSMB8</i>  | qPCR    | Forward   | CCTTACCTGCTTGGCACCATGT        |
|               |         | Reverse   | TTGGAGGCTGCCGACACTGAAA        |
| <i>PSMB9</i>  | qPCR    | Forward   | CGAGAGGACTTGTCTGCACATC        |
|               |         | Reverse   | CACCAATGGCAAAGGCTGTGCG        |
| <i>CCND1</i>  | qPCR    | Forward   | CTGGCCATGAACTACCTGGA          |
|               |         | Reverse   | GTCACACTTGATCACTCTGG          |
| <i>VEGFA</i>  | qPCR    | Forward   | CAAGACAAGAAAATCCCTGTGG        |
|               |         | Reverse   | GCTTGTCACATCTGCAAGTACG        |
| <i>RPL5</i>   | qPCR    | Forward   | CCAAATACAGGATGATAGTTCGTG      |
|               |         | Reverse   | TTGGCAGTTCGTGTGCATACGC        |
| <i>RPL6</i>   | qPCR    | Forward   | CCTTGTCAGAGGAATTGGCAGG        |
|               |         | Reverse   | GTAACAGTTGCGAGAACCTTCTC       |
| <i>RPL7L1</i> | qPCR    | Forward   | TGACAAGGTGCGTCTCAGACGA        |
|               |         | Reverse   | TCTGCACCAGTAAACTCACGCC        |
| <i>RPL14</i>  | qPCR    | Forward   | GCCGCGAGTAAAAAGGCTCCAG        |
|               |         | Reverse   | TGCCTTTGGAGCAGGTGCTTTC        |
| <i>RPL24</i>  | qPCR    | Forward   | CTCGGCAGATAAACTGGACTGTC       |
|               |         | Reverse   | GCAAGAGATGCACCAGTAATGGC       |
| <i>RPL26</i>  | qPCR    | Forward   | GGCTAATGGCACAAGTGTCCAC        |
|               |         | Reverse   | GGCGAGATTTGGCTTTCCGTTT        |
| <i>RPL27</i>  | qPCR    | Forward   | TGGACAAAAGTGTGCTCAATAAGG      |
|               |         | Reverse   | AGAACCACTTGTTCTTGCCGTGC       |
| <i>RPL34</i>  | qPCR    | Forward   | GACCTAAAGTTCTTATGAGATTGTC     |
|               |         | Reverse   | CTGACTCTGTGCTTGTGCCTTC        |

|               |      |         |                          |
|---------------|------|---------|--------------------------|
| <i>RPS23</i>  | qPCR | Forward | AGGAAGTGTGTAAGGGTCCAGC   |
|               |      | Reverse | CACCAACAGCATGACCTTTGCG   |
| <i>RPS27A</i> | qPCR | Forward | GCAGAGACTGATCTTTGCTGGC   |
|               |      | Reverse | CTTGGGAGTGGTGTAAAGACTTCT |
| <i>SNAI1</i>  | qPCR | Forward | TGCCCTCAAGATGCACATCCGA   |
|               |      | Reverse | GGGACAGGAGAAGGGCTTCTC    |
| <i>COL4A1</i> | qPCR | Forward | TGTTGACGGCTTACCTGGAGAC   |
|               |      | Reverse | GGTAGACCAACTCCAGGCTCTC   |
| <i>CRB3</i>   | qPCR | Forward | CTTCTGCAAATGAGAATAGCACTG |
|               |      | Reverse | GACCACGATGATAGCAGTGATGG  |
| <i>DSP</i>    | qPCR | Forward | TGACAGACCGCTGGCAAAGGAT   |
|               |      | Reverse | GGCGTTTAGCATCATAGAGCCAC  |
| <i>MUC1</i>   | qPCR | Forward | CCTACCATCCTATGAGCGAGTAC  |
|               |      | Reverse | GCTGGGTTTGTGTAAGAGAGGC   |
| <i>OCN</i>    | qPCR | Forward | ATGGCAAAGTGAATGACAAGCGG  |
|               |      | Reverse | CTGTAACGAGGCTGCCTGAAGT   |
| <i>GSK3B</i>  | qPCR | Forward | CCGACTAACACCACTGGAAGCT   |
|               |      | Reverse | AGGATGGTAGCCAGAGGTGGAT   |

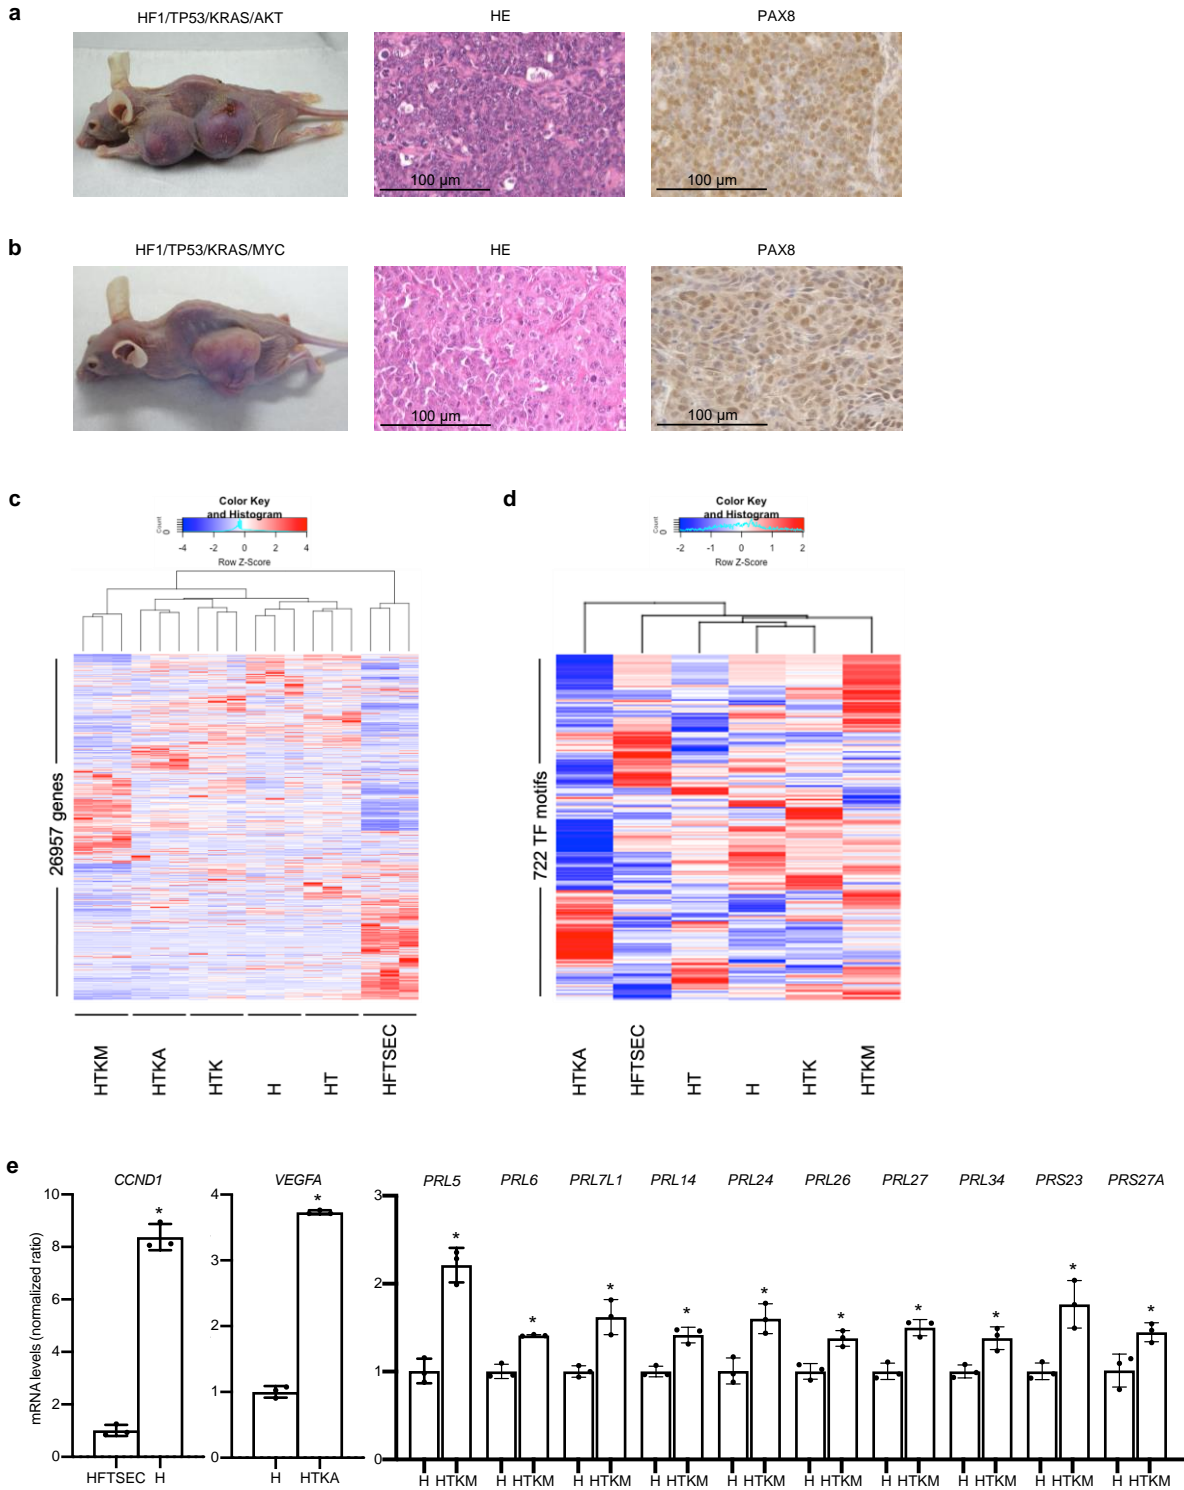

**Supplementary Fig. 1 Mouse xenograft experiments and integrative analysis of stepwise HGSOc model cells.** **a–b** Subcutaneous mouse xenograft experiments using HF1/TP53/KRAS/AKT (a) and HF1/TP53/KRAS/MYC (b) cells, respectively. The confirmation of the HGSOc-like phenotype in the mouse xenograft experiments was carried out by a pathologist who examined the results of hematoxylin eosin (HE) staining and PAX8 staining, which is a positive marker for HGSOc. Scale bars, 100  $\mu$ m. Detailed information of mouse xenograft experiments is previously described<sup>11</sup>. **c** A heatmap with hierarchical clustering of gene expression levels calculated using RNA-seq. **d** A heatmap with hierarchical clustering of TF motif enrichment scores calculated using ATAC-seq. **e** mRNA expression levels (RT-qPCR; n = 3) of *CCND1*, *VEGFA*, and ribosomal protein genes in the indicated HGSOc model cells. Error bars represent mean  $\pm$  standard deviation (SD). Statistical analysis was performed using unpaired Student's t-test. \*  $p < 0.05$ .

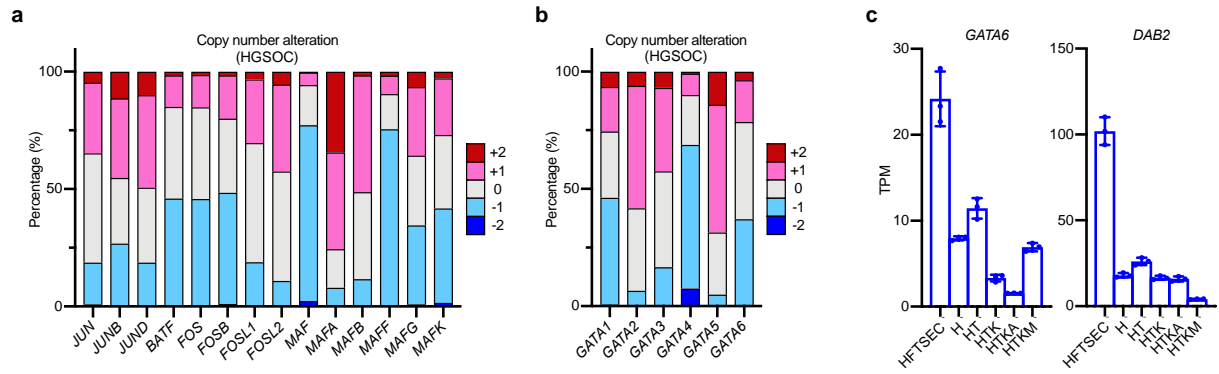

**Supplementary Fig. 2 AP-1 family and GATA family genes are dysregulated in HGSOCS.** **a–b** Copy number alteration (CNA) of AP-1 family genes (a) and GATA family genes (b) in HGSOCS samples. Each sample was segregated according to their CNA status: amplification (CNA = +2); gain (CNA = +1); duplicate (CNA = 0); deletion (CNA = -1); deep deletion (CNA = -2). Data are sourced from TCGA project of HGSOCS. **c** mRNA expression levels (RNA-seq, n = 3) of *GATA6* and *DAB2* are downregulated in HGSOCS model cells. Error bars represent mean  $\pm$  standard deviation (SD).

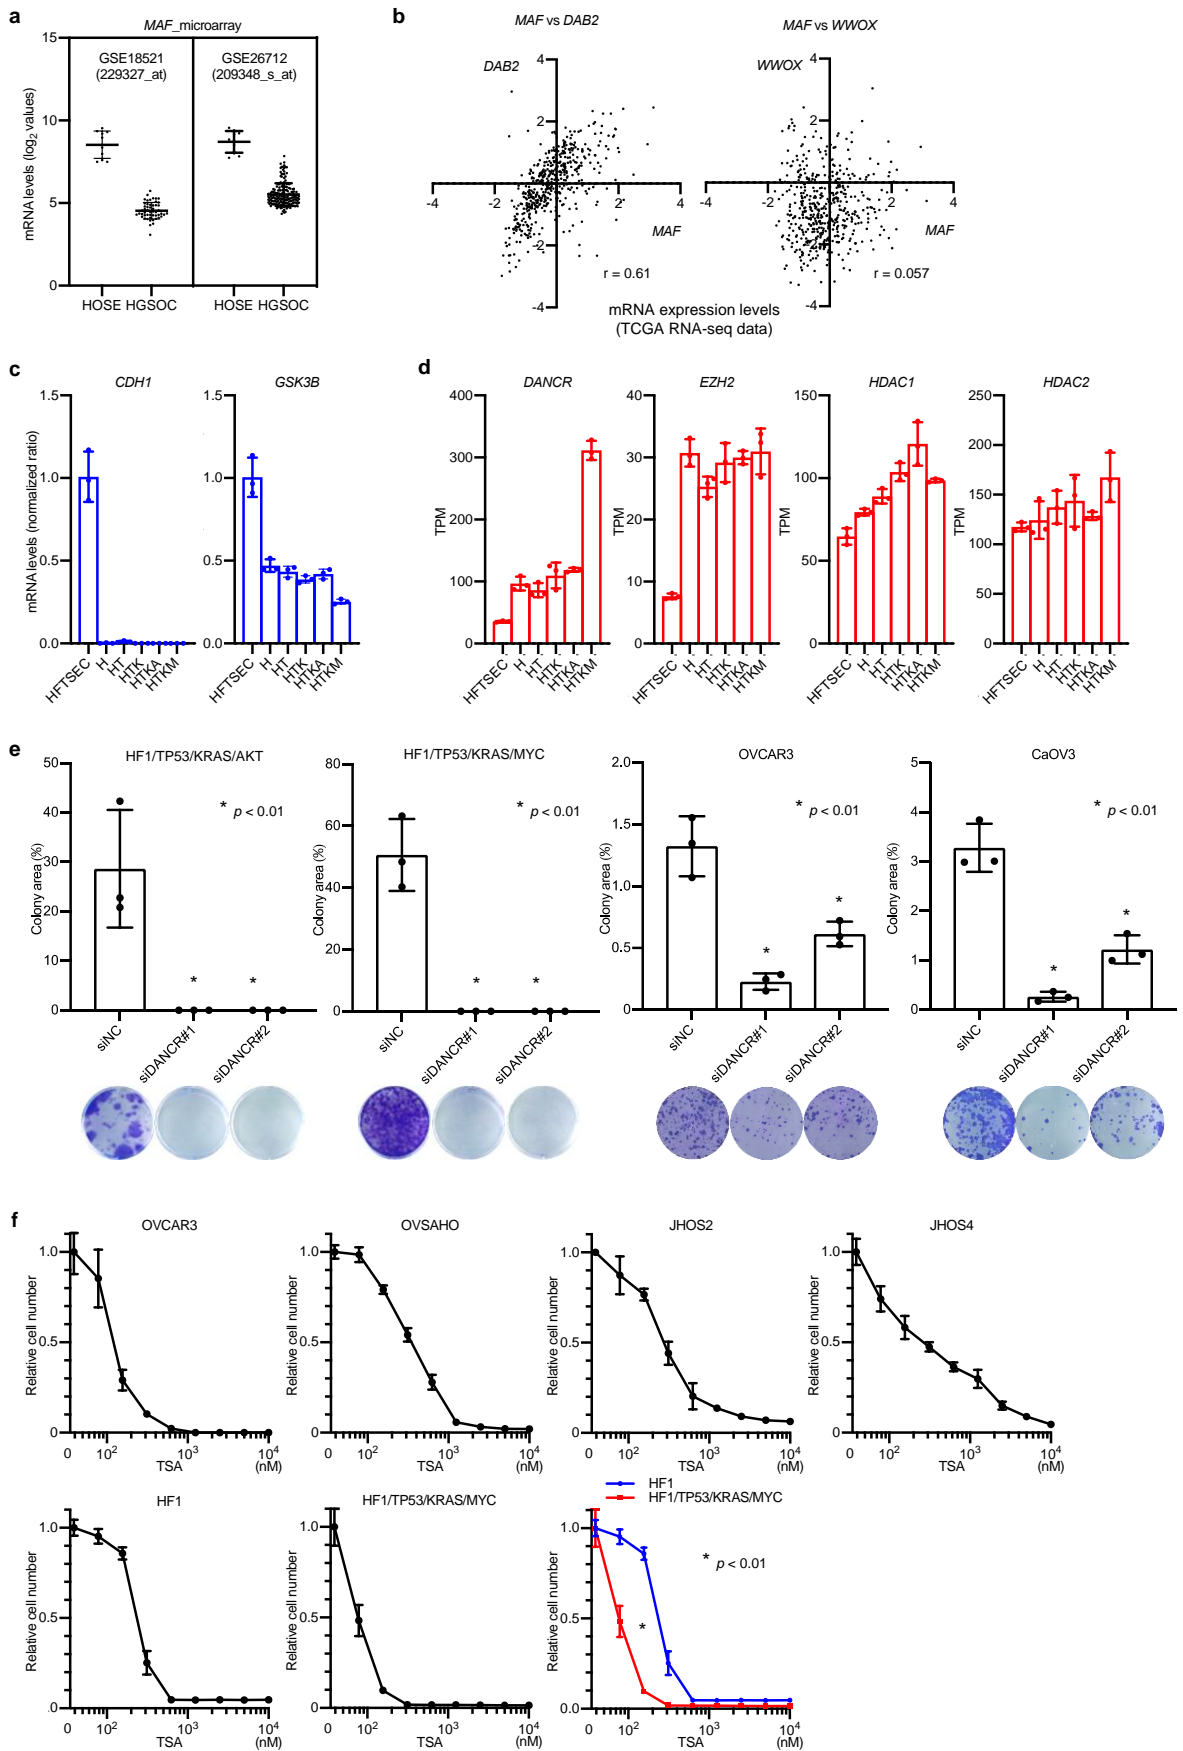



**Supplementary Fig. 3 Integrative analysis identifies targetable genes in HGSOCS.** **a** mRNA expression levels of *MAF* in two independent microarray datasets. GSE18521 and GSE26712 contain microarray data of human ovarian surface epithelial cell (HOSE) samples and HGSOC samples [GSE18521(HOSE: n = 10, HGSOC: n = 53) and GSE26712 (HOSE: n = 10, HGSOC: n = 185)]. Statistical analysis was performed using unpaired Student's t-test. Error bars represent mean  $\pm$  standard deviation (SD). **b** mRNA expression levels of *MAF* are plotted against those of *DAB2* and *WWOX* (n = 489). The data were analyzed using Pearson's correlation coefficients. **c** mRNA expression levels (RT-qPCR, n = 3) of epithelial-mesenchymal transition (EMT)-related genes. Downregulation of epithelial markers, including *CDH1* and *GSK3B*, are observed during oncogenic transformation. Error bars represent mean  $\pm$  standard deviation (SD). **d** mRNA expression levels (RNA-seq, n = 3) of *DANCR*, *EZH2*, *HDAC1* and *HDAC2* are upregulated in HGSOC model cells. Error bars represent mean  $\pm$  SD. **e** Colony formation assay with *DANCR* siRNA knockdown experiments in HF1/TP53/KRAS/AKT, HF1/TP53/KRAS/MYC, OVCAR3, and CaOV3 cells. Error bars represent mean  $\pm$  SD of three biological replicates. Statistical analysis was performed using unpaired Student's t-test. **f** Cell viability assay with TSA treatment. The cytotoxic effects of TSA are amplified in tumorigenic HGSOC model cells. Relative cell number shows the relative ratio between the number of cells in the absence of the inhibitors and the number of cells in the presence of various concentrations of TSA. Error bars represent mean  $\pm$  SD of three biological replicates.

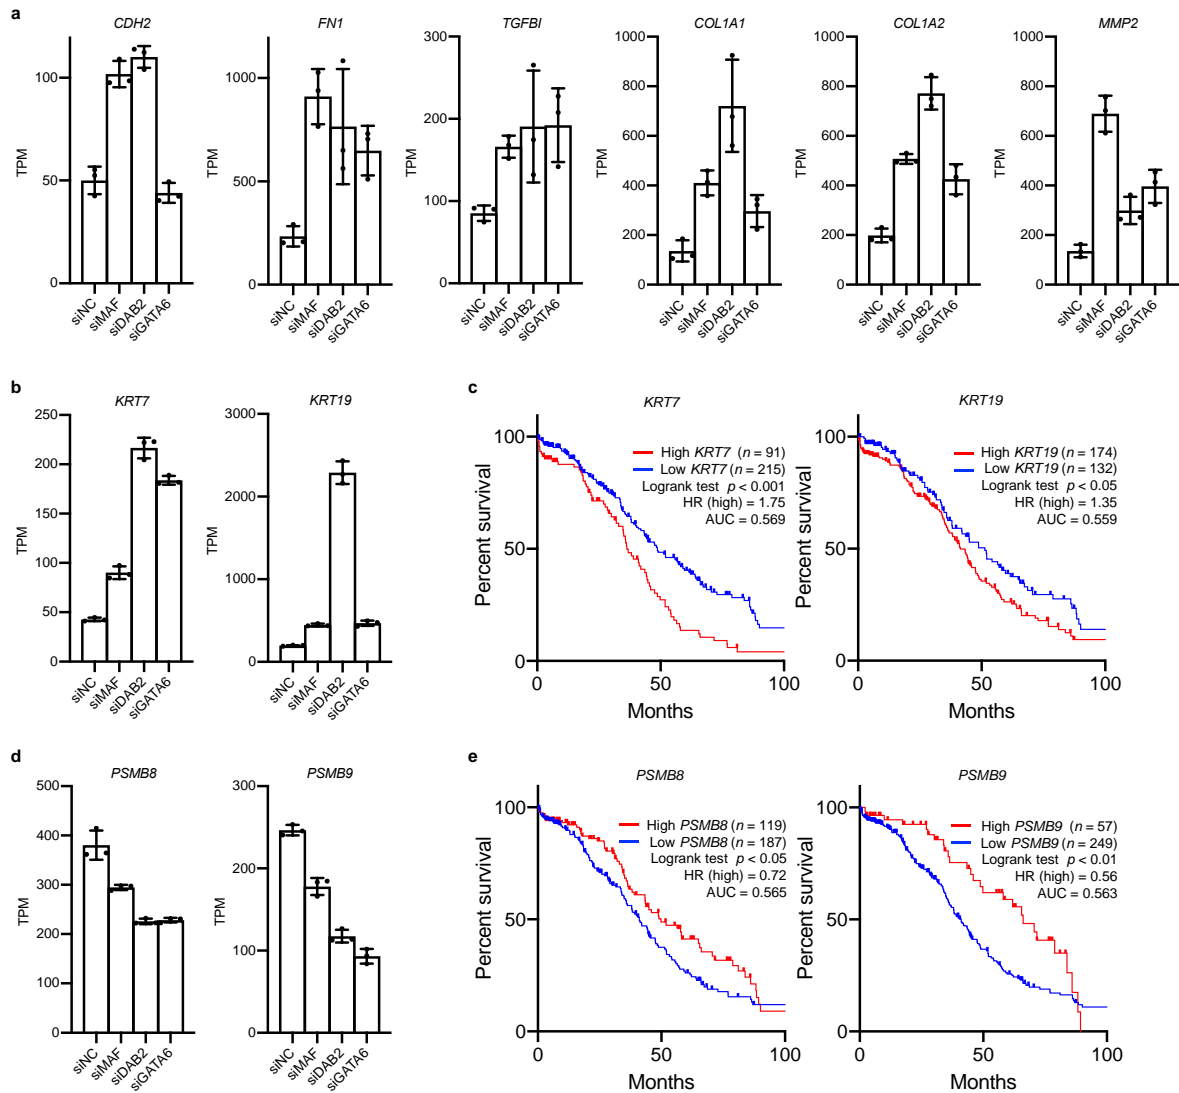

**Supplementary Fig. 4 Inhibition of *MAF*, *GATA6* and *DAB2* upregulates epithelial-mesenchymal transition (EMT)-related genes and poor prognostic genes of HGSCs.** **a** mRNA expression levels (RNA-seq; n = 3) of EMT-related genes upon siRNA knockdown of *MAF*, *GATA6* and *DAB2* in HF1 cells. Inhibition of *MAF*, *GATA6* and *DAB2* upregulates EMT-related genes. Error bars represent mean  $\pm$  standard deviation (SD). **b** mRNA expression levels (RNA-seq; n = 3) of *KRT7* and *KRT19* genes upon siRNA knockdown of *MAF*, *GATA6* and *DAB2* in HF1 cells. Error bars represent mean  $\pm$  SD. **c** Kaplan-Meier survival curves classified by high or low *KRT7* or *KRT19* mRNA expression levels in the TCGA HGSC cohort. High *KRT7* and high *KRT19* group exhibits poor overall survival. **d** mRNA expression levels (RNA-seq; n = 3) of *PSMB8* and *PSMB9* genes upon siRNA knockdown of *MAF*, *GATA6* and *DAB2* in HF1 cells. Error bars represent mean  $\pm$  SD. **e** Kaplan-Meier survival curves classified by high or low *PSMB8* or *PSMB9* mRNA expression levels in the TCGA HGSC cohort. Low *PSMB8* and Low *PSMB9* group exhibits poor overall survival.

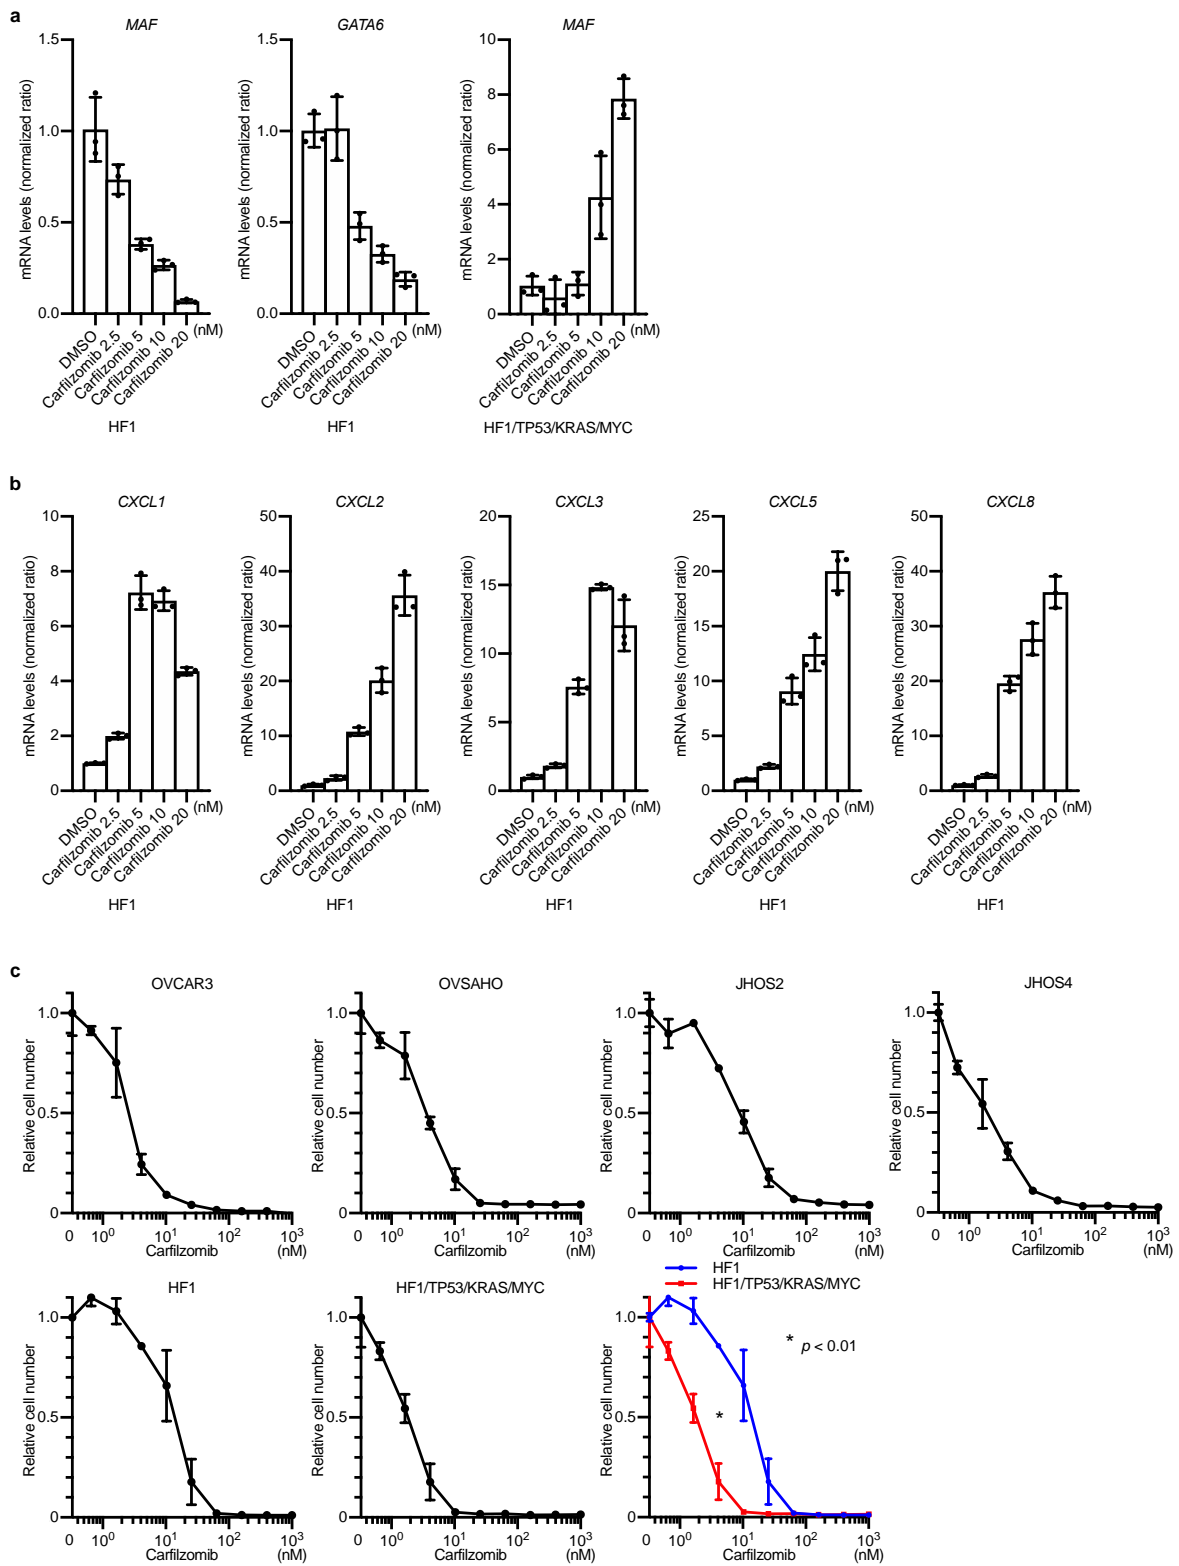

**Supplementary Fig. 5 A proteasome inhibitor causes both of early oncogenic alterations and tumor suppressive effects.** **a** mRNA expression levels (RT-qPCR; n = 3) of *MAF*, *GATA6* upon carfilzomib treatment in HF1 and HF1/TP53/KRAS/MYC cells. Inhibition of proteasome imitate the early oncogenic alterations of *MAF* and *GATA6* downregulation in HF1 cells, whereas it recovers *MAF* expression in HF1/TP53/KRAS/MYC cells. Error bars represent mean  $\pm$  standard deviation (SD). **b** mRNA expression levels (RT-qPCR; n = 3) of chemokine genes are upregulated upon carfilzomib treatment in HF1 cells. Error bars represent mean  $\pm$  SD. **c** Cell viability assay with carfilzomib treatment. The cytotoxic effects of carfilzomib are amplified in HGSOc model cells. Relative cell number shows the relative ratio between the number of cells in the absence of the inhibitors and the number of cells in the presence of various concentrations of carfilzomib. Error bars represent mean  $\pm$  SD of three biological replicates.

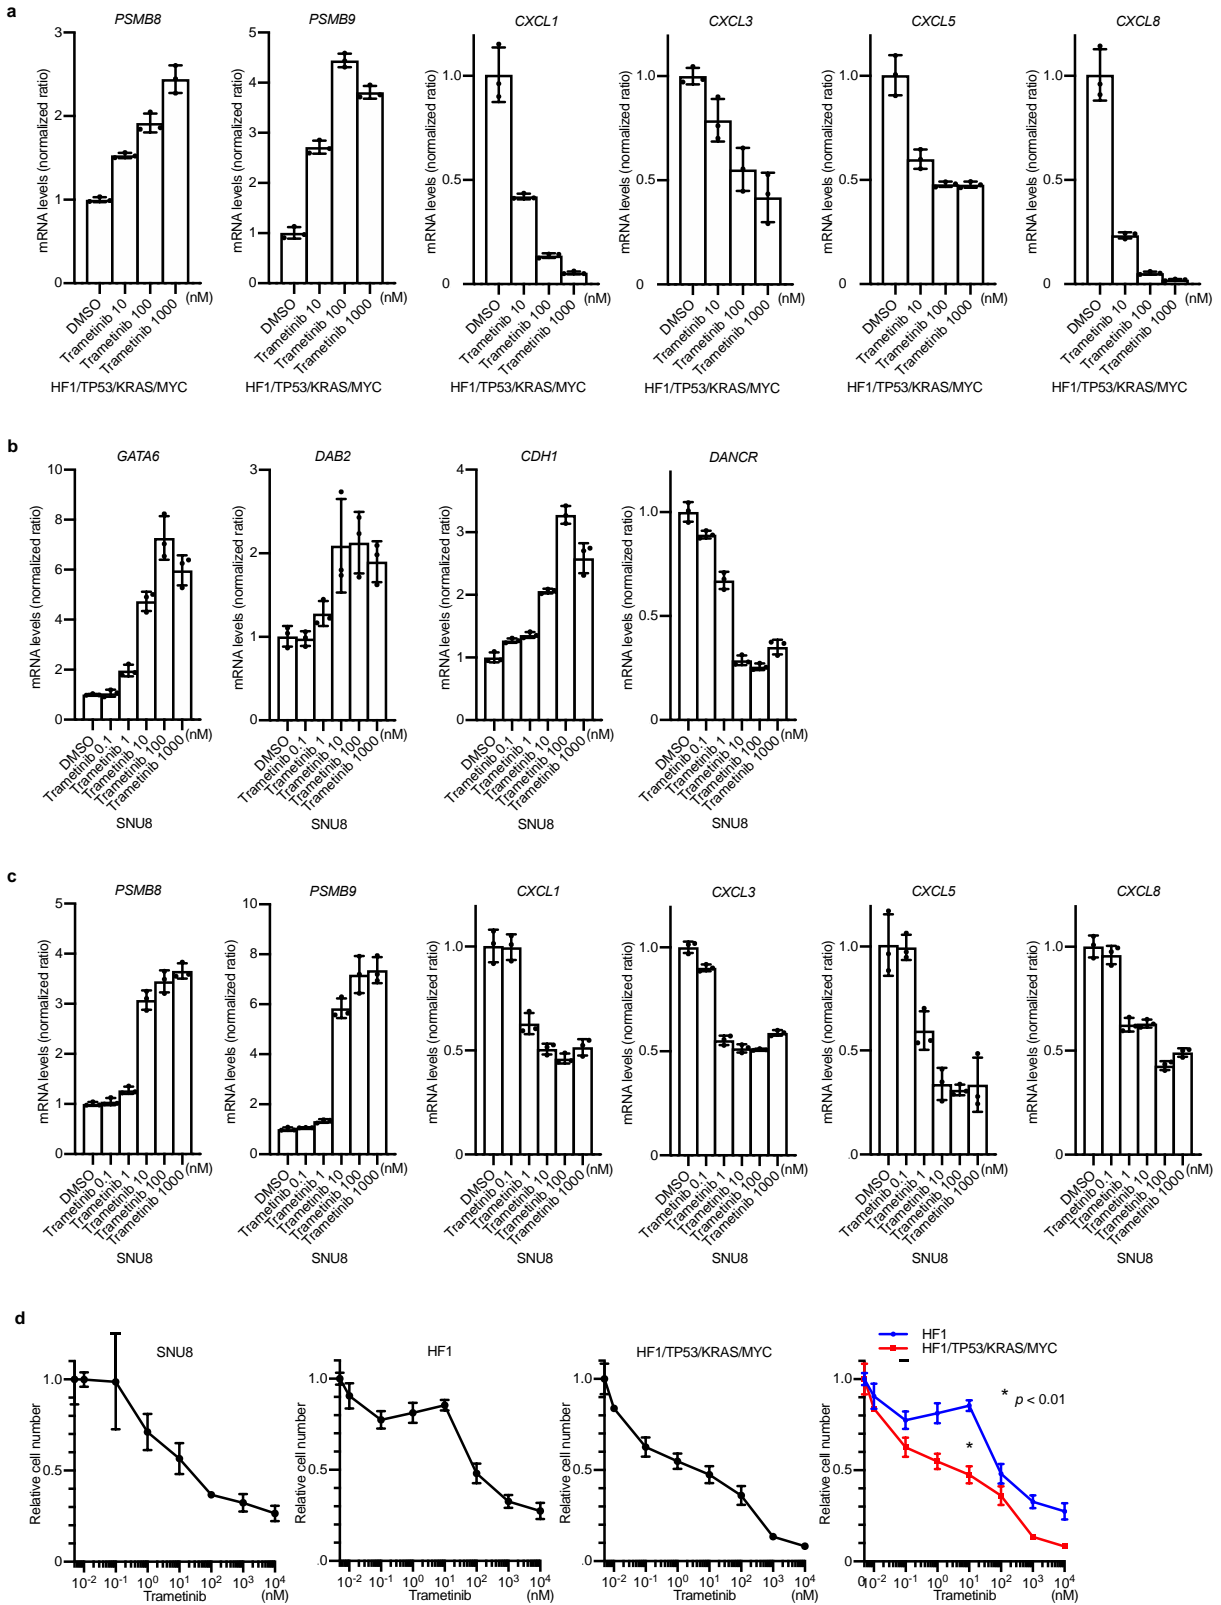

**Supplementary Fig. 6 A MEK inhibitor reverses early oncogenic alterations in HGSOCs. a** mRNA expression levels (RT-qPCR; n = 3) of immunoproteasome and chemokine genes upon trametinib treatment in HF1/TP53/KRAS/MYC cells. Error bars represent mean  $\pm$  standard deviation (SD). **b,c** mRNA expression levels (RT-qPCR; n = 3) of dysregulated genes in HGSOCs are recovered upon carfilzomib treatment in SNU8 cells. Error bars represent mean  $\pm$  SD. **d** Cell viability assay with trametinib treatment. The cytotoxic effects of trametinib are amplified in HGSOC model cells. Relative cell number shows the relative ratio between the number of cells in the absence of the inhibitors and the number of cells in the presence of various concentrations of carfilzomib. Error bars represent mean  $\pm$  SD of three biological replicates.

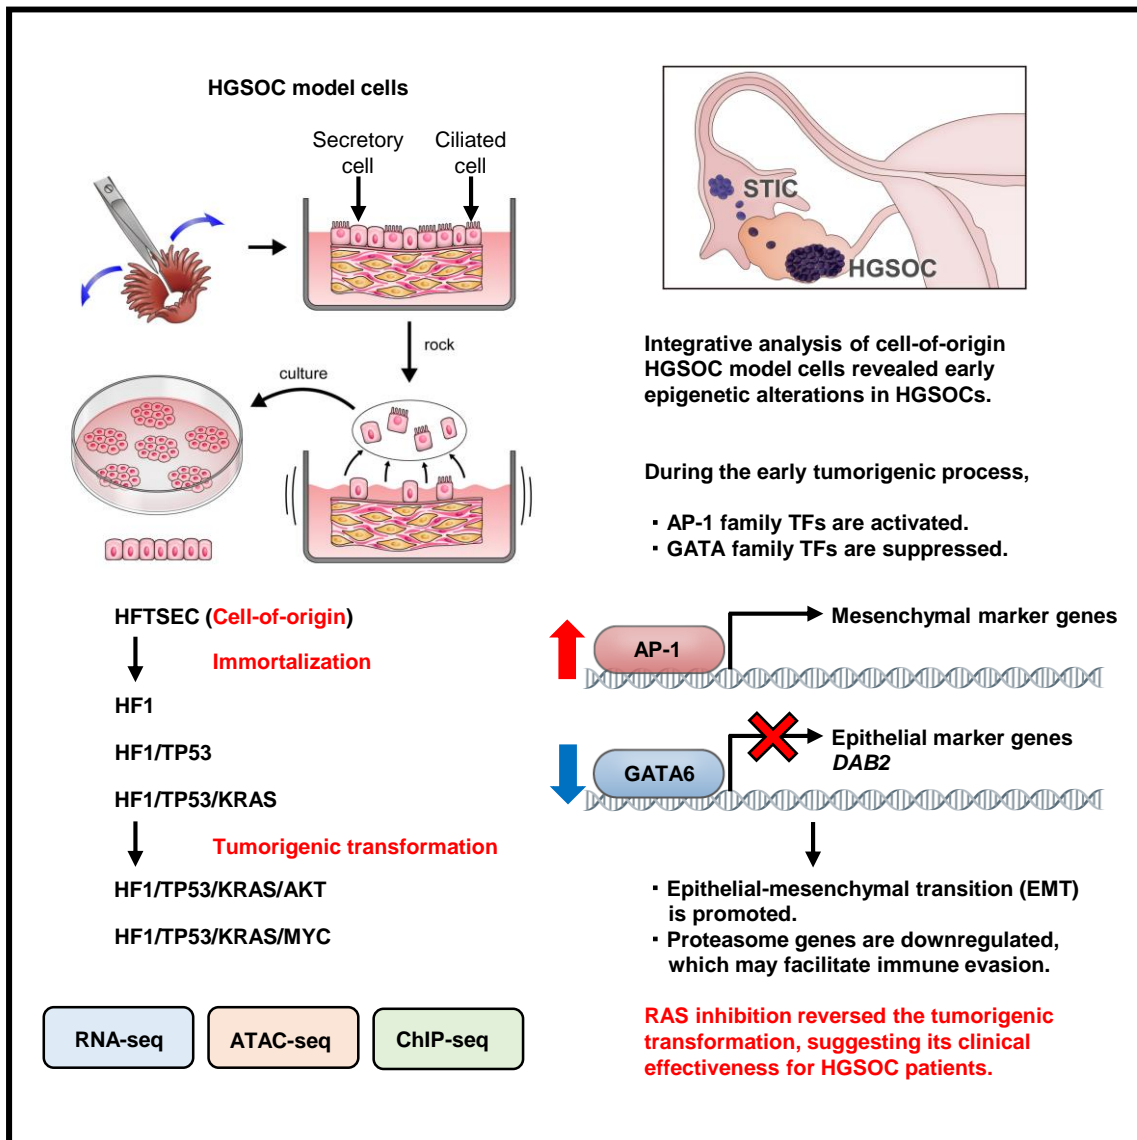

Supplementary Fig. 7 A graphical summary of the present study.
